# Supplementary material for: A deubiquitinase negatively regulates retro-translocation of nonubiquitinated substrates
Source: PubMed Central journal article supplement — Mol Biol Cell. 2013 Nov 15;24(22):3545–56. doi: 10.1091/mbc.E13-06-0332 (PMC3826992; doi:10.1091/mbc.e13-06-0332), 2013-11-15

# Supplemental Materials

*Molecular Biology of the Cell*

Bernardi et al.

## **A deubiquitinase negatively regulates retro-translocation of non-ubiquitinated substrates**

Kaleena M. Bernardi<sup>1</sup>, Jeffrey M. Williams<sup>1</sup>, Takamasa Inoue<sup>1</sup>, Aric Schultz<sup>2</sup>, and Billy Tsai<sup>1\*</sup>

### **Supplementary Figure Legend**

**Figure S1.** Atx3 and USP14 knockdown do not significantly affect CTA1 retro-translocation. (A) As in 2A, except cells were transfected with Atx3 #1 or #2 siRNA. (B) As in 2C, except cells were transfected with Atx3 #1 or #2 siRNA. (C) The supernatant CTA1 band intensity in B was analyzed as in 2D. Mean of at least three independent experiments. A two-tailed t test was used. Error bars, +/- SD. (D) As in A, except cells were transfected with an USP14 siRNA. (E) As in B, except cells were transfected with an USP14 siRNA. (F) The supernatant CTA1 band intensity in E was analyzed as in 2D. Mean of at least three independent experiments. A two-tailed t test was used. Error bars, +/- SD.

**Figure S2.** YOD1 knockdown does not induce cholera toxin polyubiquitination. As in 4A, except His-Ub was used.

Figure S1. Atx3 and USP14 knockdown do not significantly affect CTA1 retro-translocation

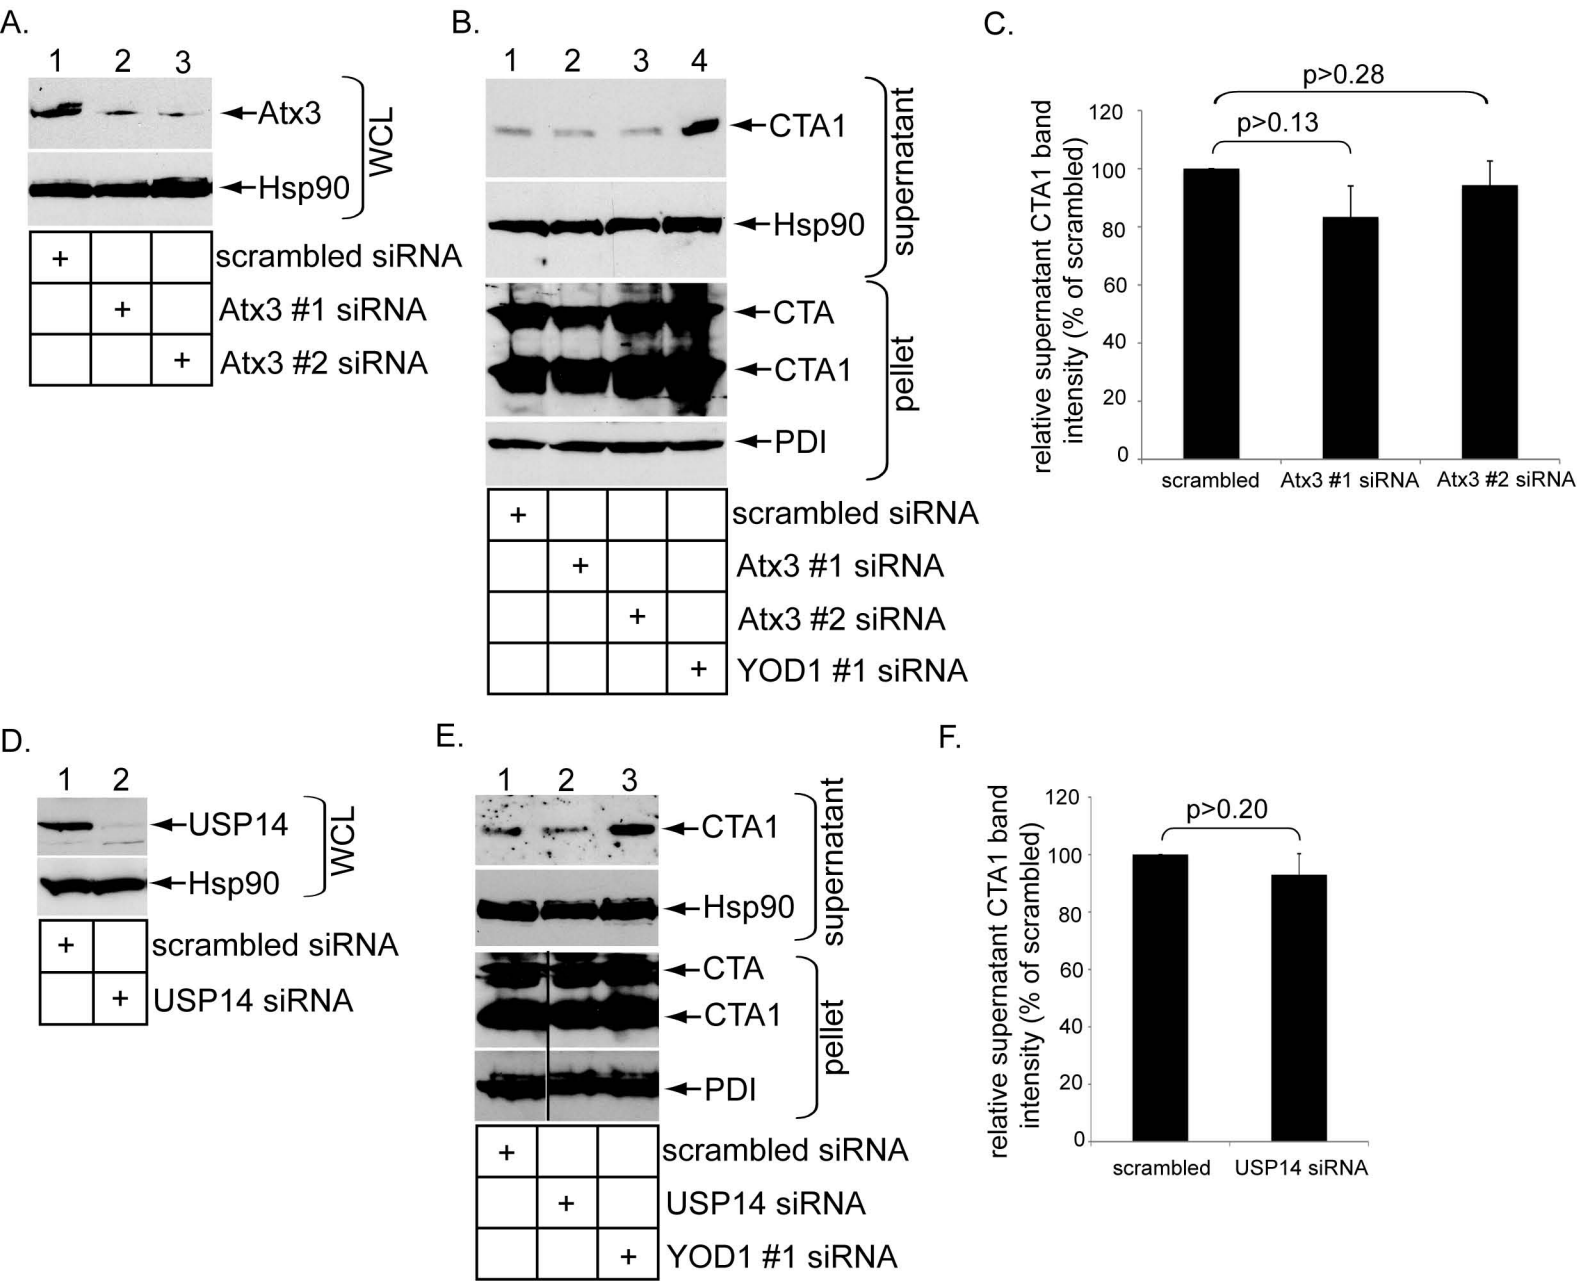

Figure S2. YOD1 knockdown does not promote cholera toxin polyubiquitination

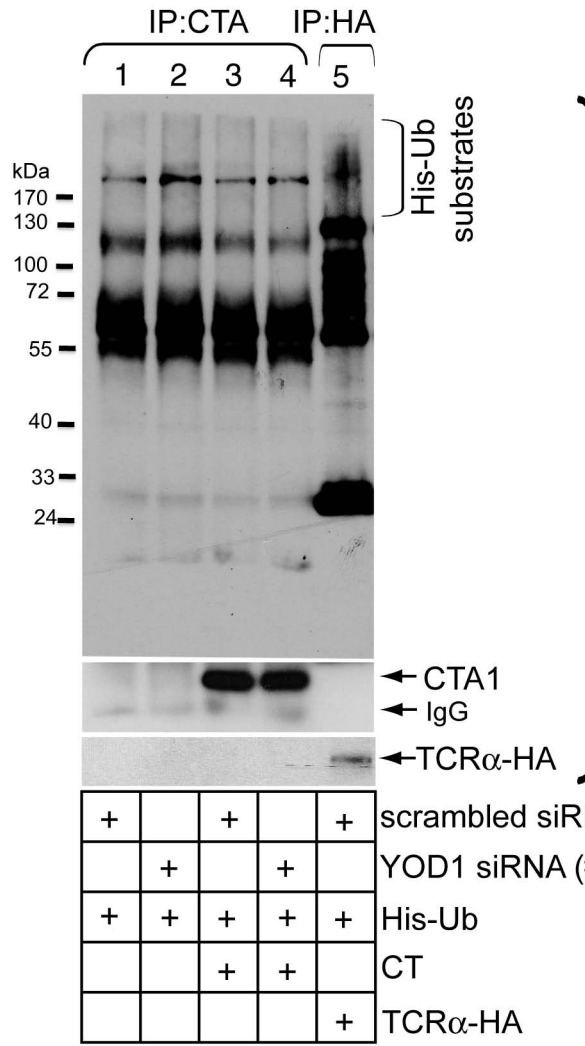

Supplement: supp_E13-06-0332_CombinedSupMats.pdf [file supp_E13-06-0332_CombinedSupMats.pdf]
